# Supplementary material for: High speed growth of MAPbBr3 single crystals via low-temperature inverting solubility: enhancement of mobility and trap density for photodetector applications
Source: Royal Society of Chemistry journal article supplement (doi:10.1039/d1nr01600h), 2021-01-01
Supplement: d1nr01600h1.pdf [file d1nr01600h1.pdf]

**Supporting information**

**High speed growth of MAPbBr<sub>3</sub> single crystals via low-temperature inverting solubility: enhancement of mobility and trap density for photodetector applications**

Yunae Cho<sup>1</sup>, Hye Ri Jung<sup>1</sup>, Yeon Soo Kim<sup>1</sup>, Yejin Kim<sup>1</sup>, Joohee Park<sup>1</sup>, Seokhyun Yoon<sup>1</sup>, Yousil Lee<sup>2</sup>, Miyeon Cheon<sup>2</sup>, Se-young Jeong<sup>3</sup>, William Jo\*<sup>1</sup>

<sup>1</sup> Department of Physics, Ewha Womans University

<sup>2</sup> Crystal Bank Research Institute, Pusan National University

<sup>3</sup> Department of Optics and Mechatronics Engineering, Pusan National University

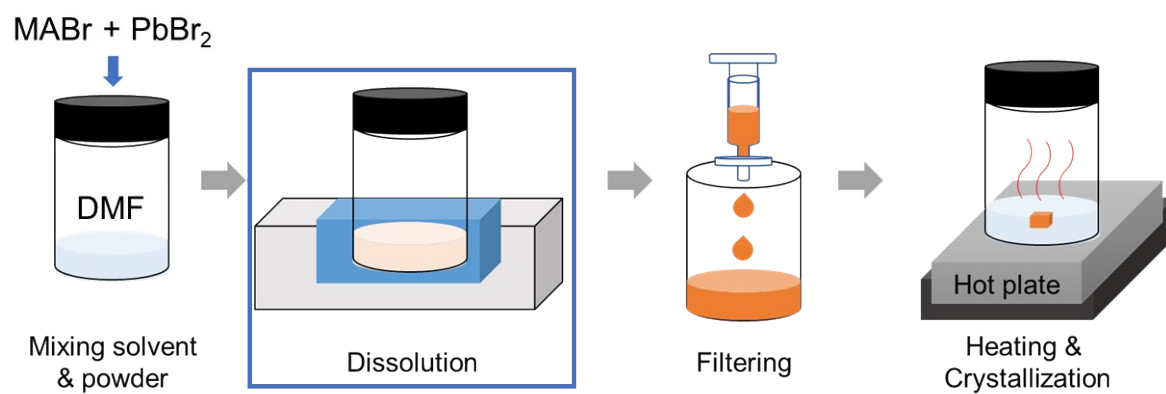

**Figure S1** Schematic representation of the ITC method displayed on the control of dissolution temperatures.

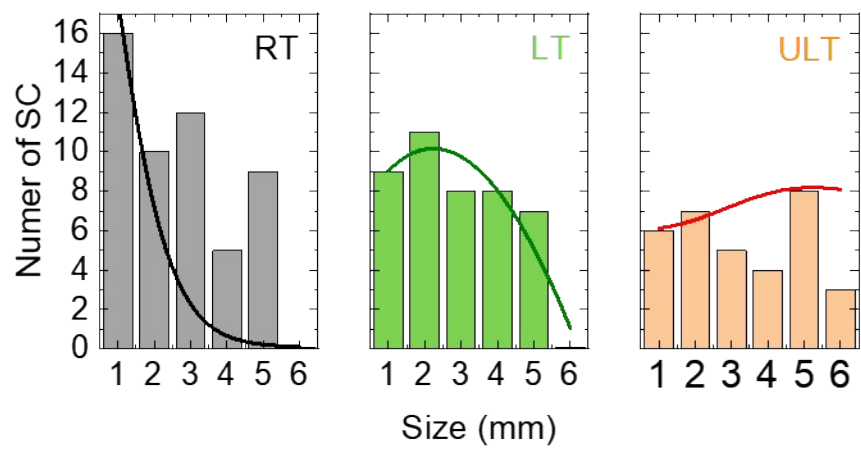

**Figure S2** The distribution of crystal size at different dissolution temperatures.

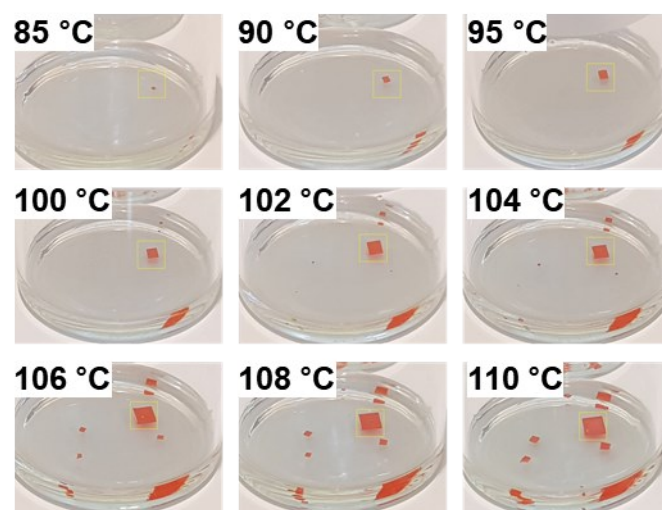

**Figure S3** MAPbBr<sub>3</sub> single crystal images at different temperatures during the heating process with LT condition.

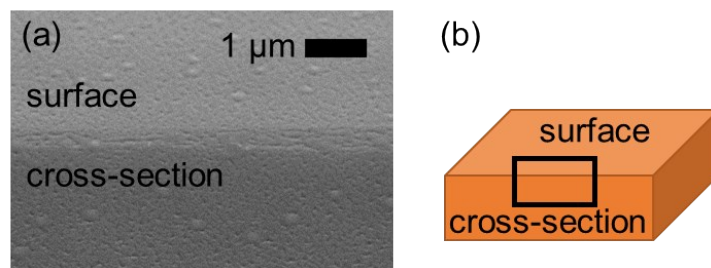

**Figure S4** (a) SEM images of surface and cross-section for MAPbBr<sub>3</sub> single crystals with LT conditions. (b) Schematic of SEM measurement region for MAPbBr<sub>3</sub> single crystal

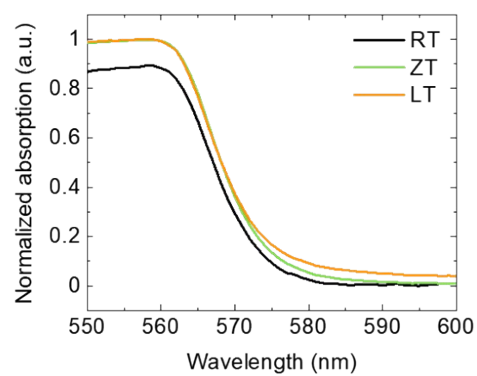

**Figure S5** Absorption of MAPbBr<sub>3</sub> single crystals with different dissolution conditions.
